# Supplementary material for: Primary Respiratory Chain Disease Causes Tissue-Specific Dysregulation of the Global Transcriptome and Nutrient-Sensing Signaling Network
Source: PubMed Central journal article supplement (PMC3722174; doi:10.1371/journal.pone.0069282), 2013-07-24
Supplement: pone.0069282.s003.pdf [file pone.0069282.s003.pdf]

**Figure S1**

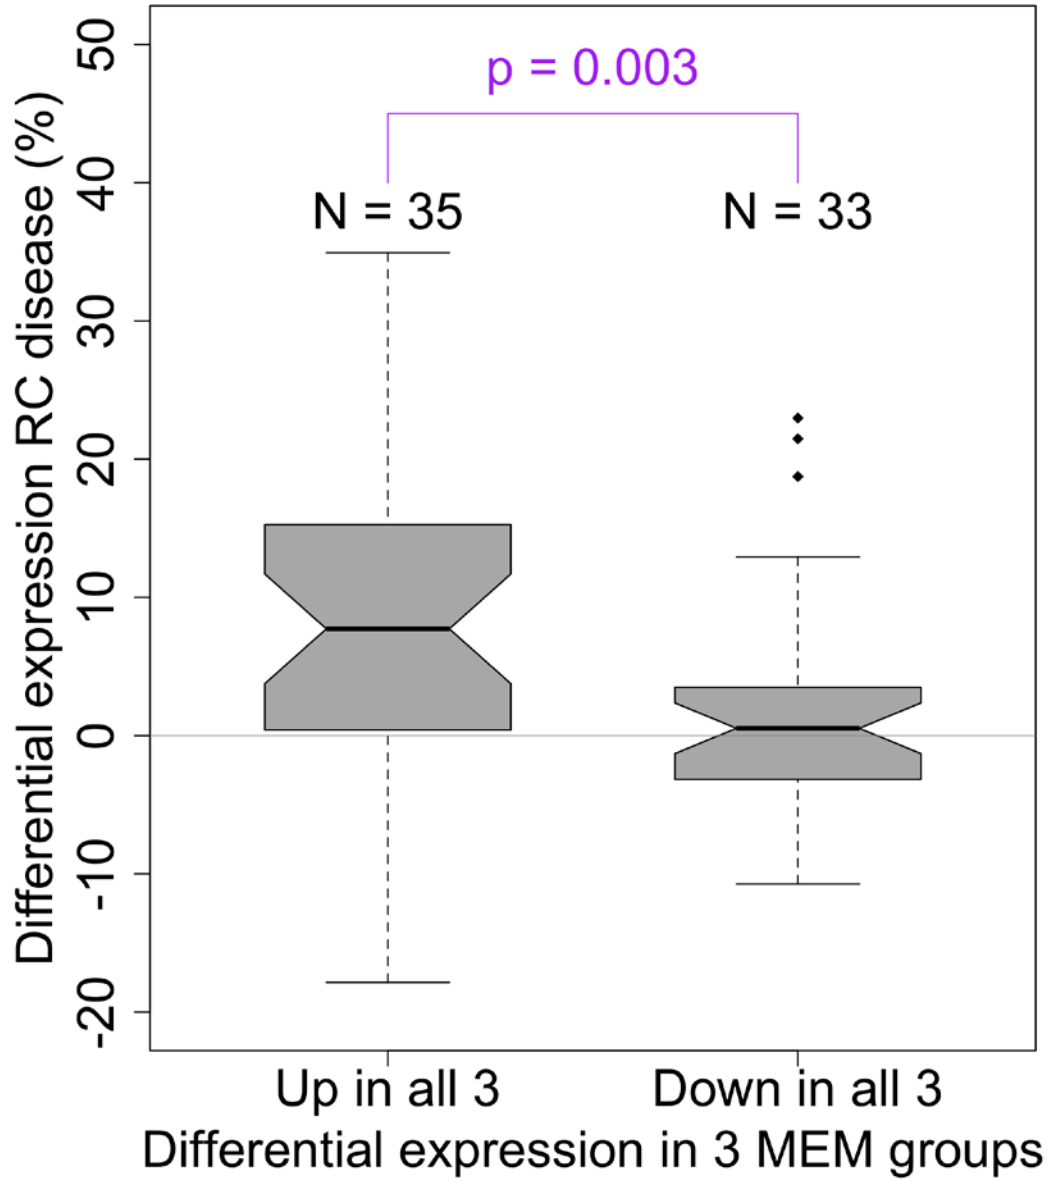

Figure S2

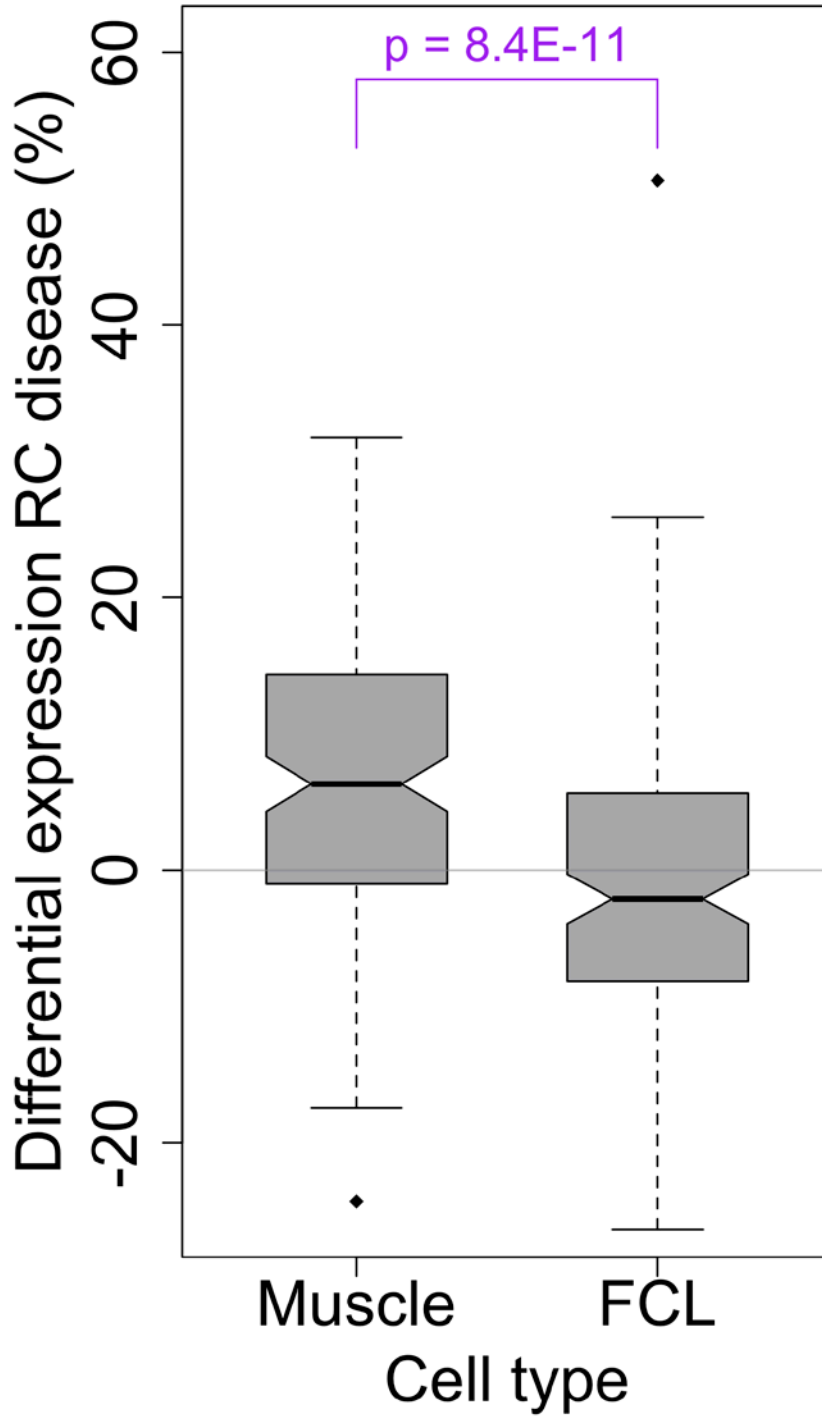

Figure S3

**A**

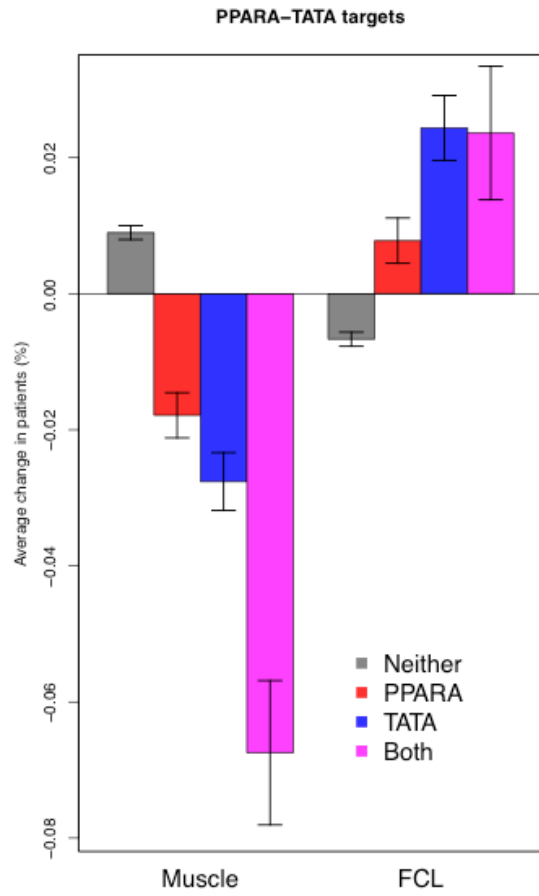

**B**

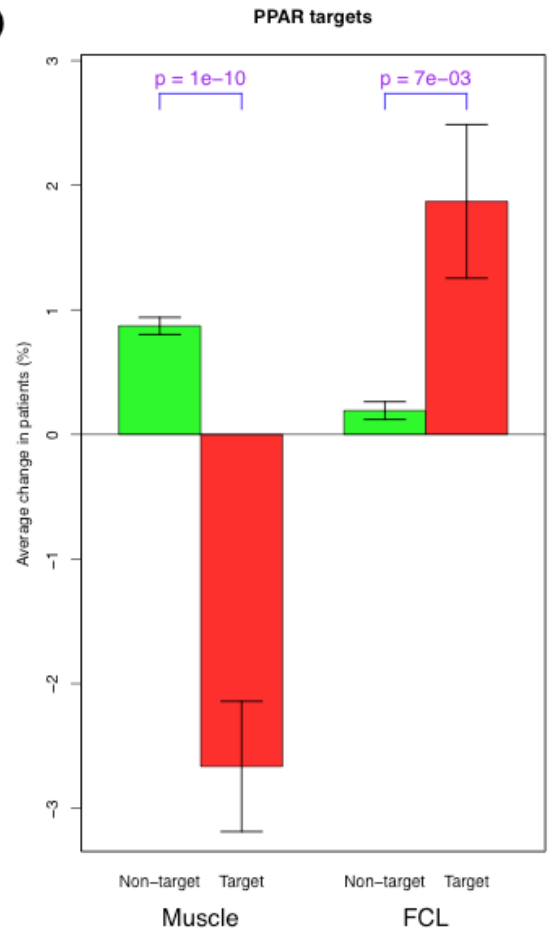

# Figure S4

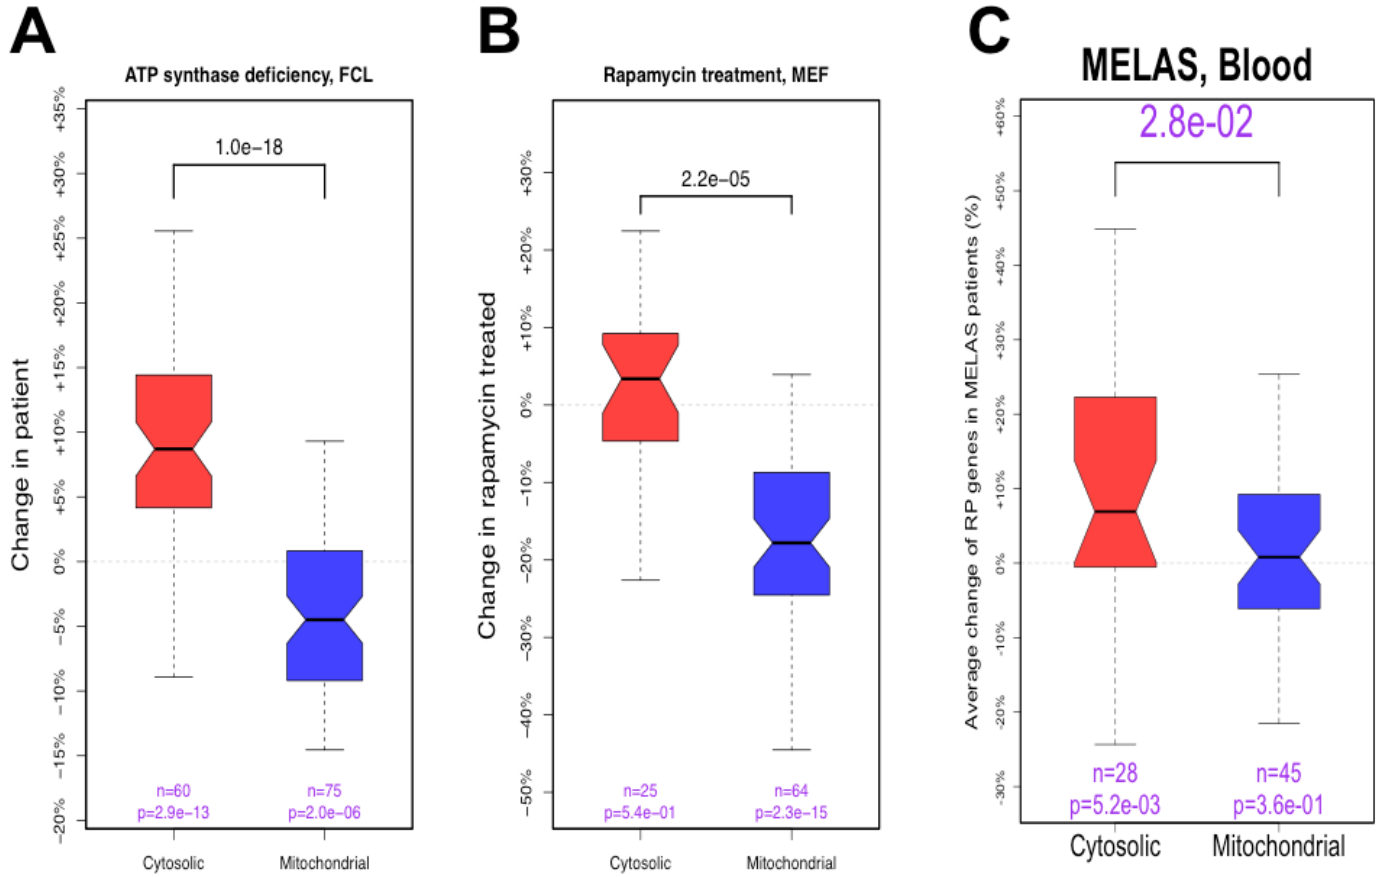

Figure S5

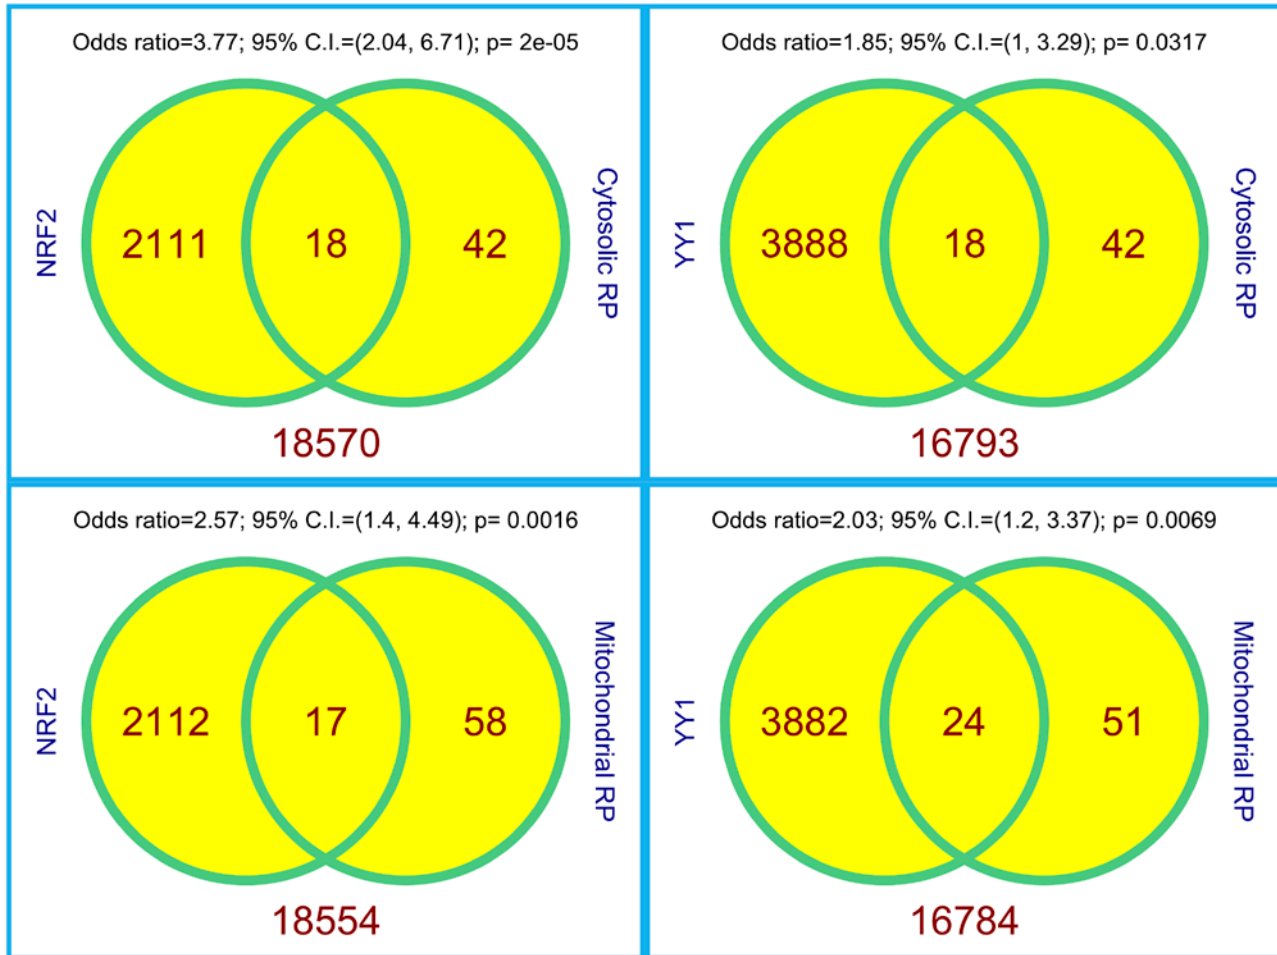

# Figure S6

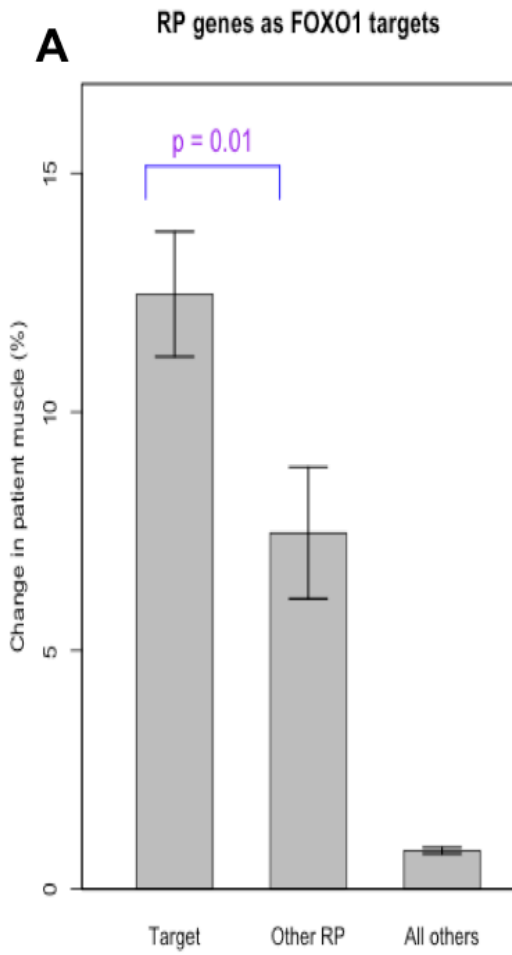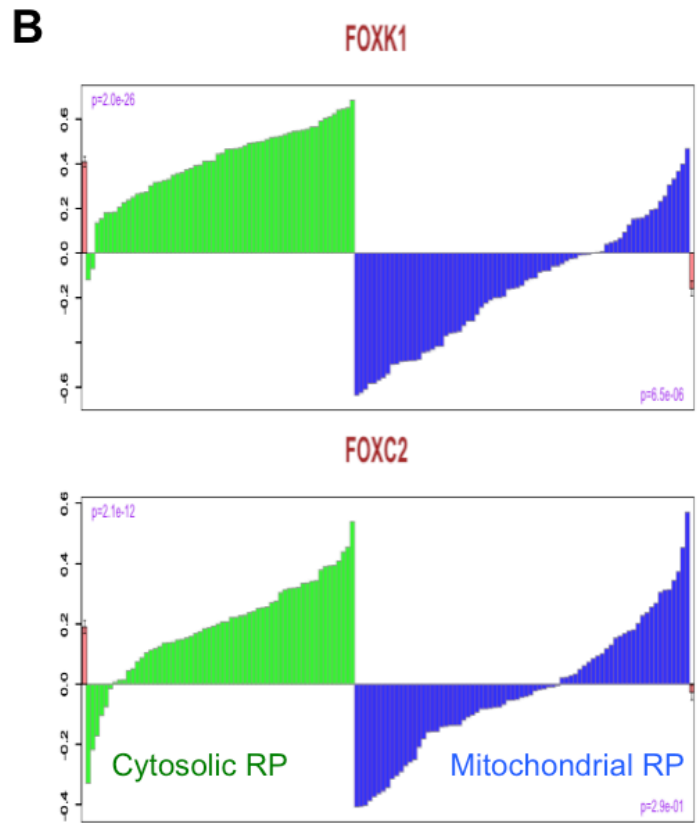

# Figure S7

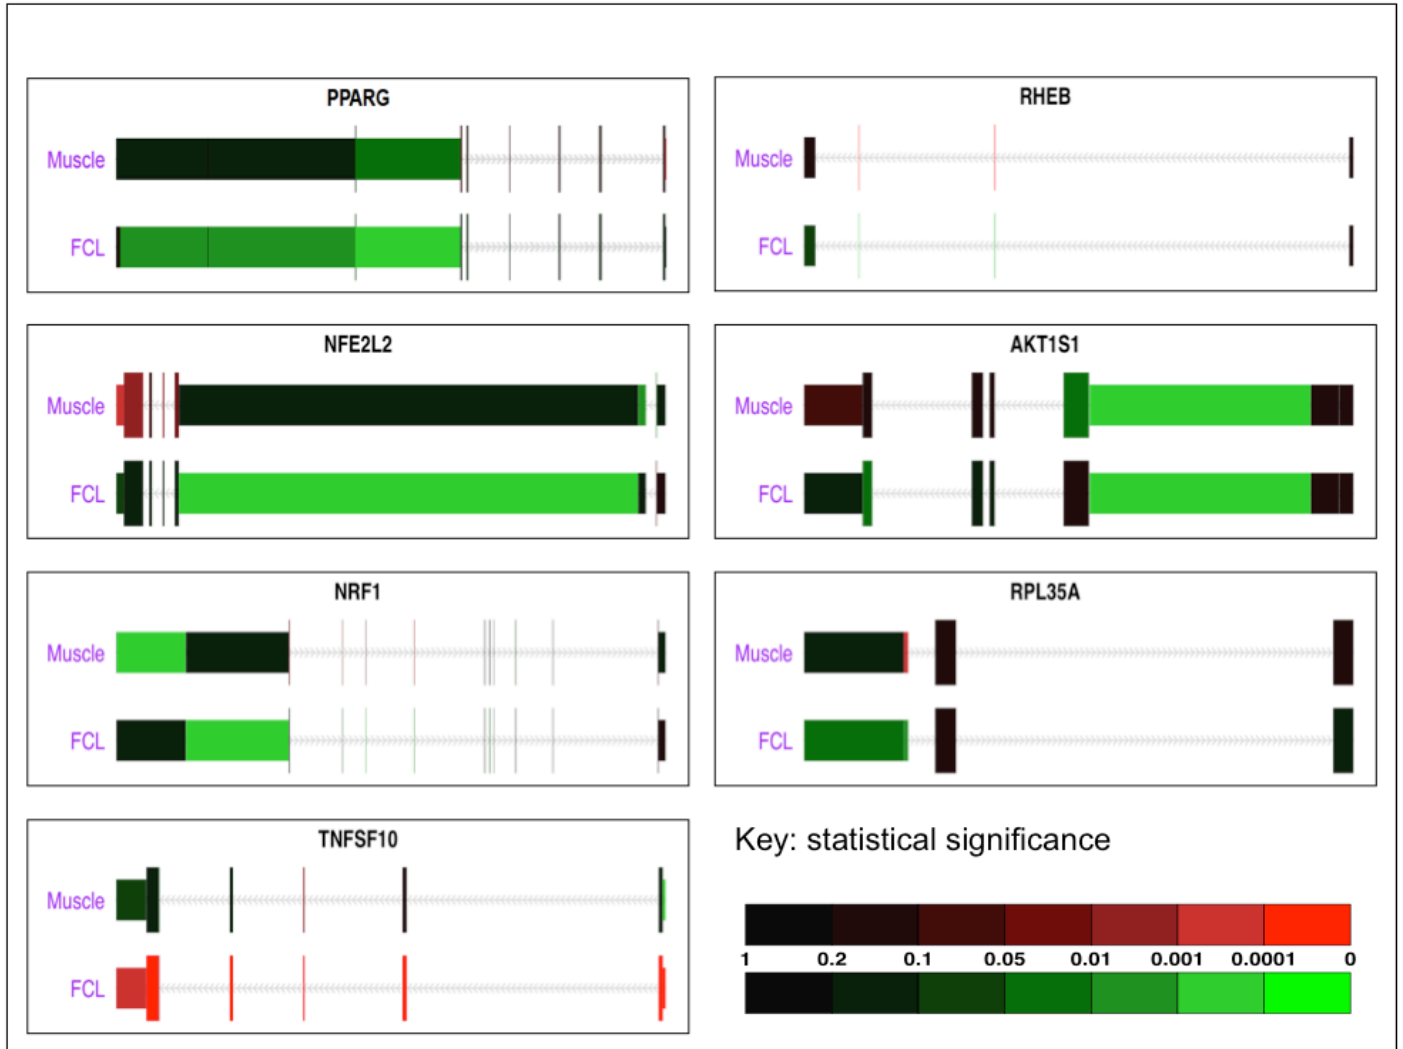

# Figure S8

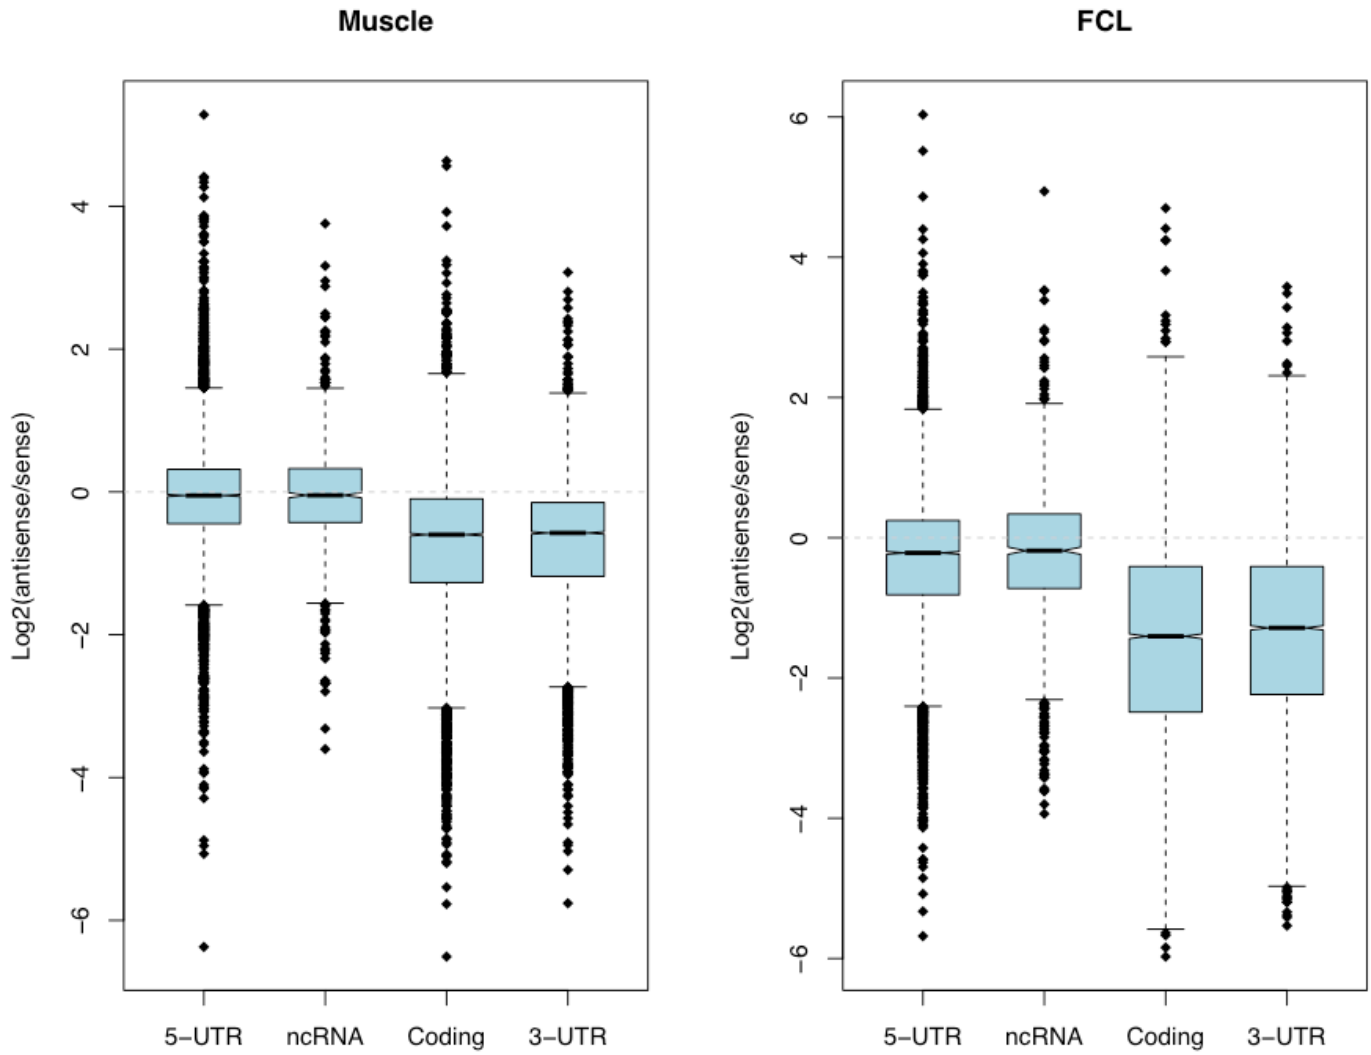



Figure S9

Muscle

FCL

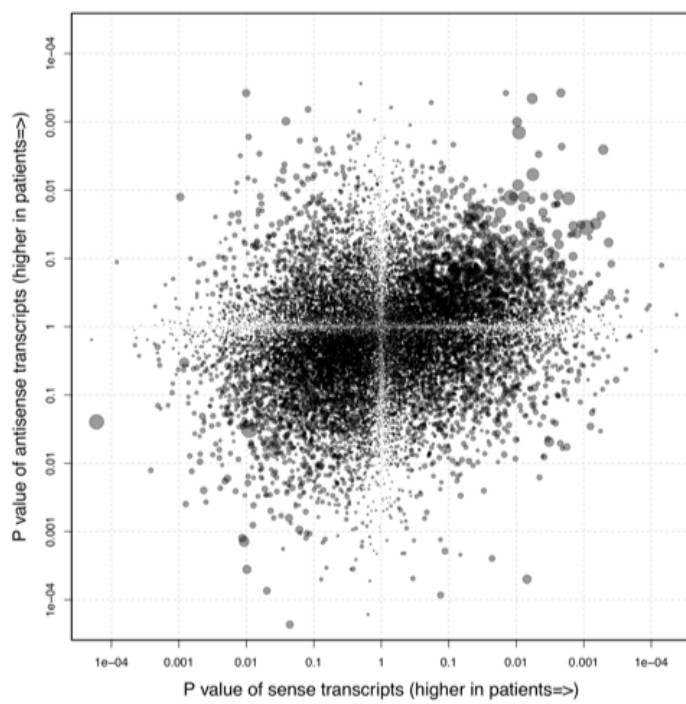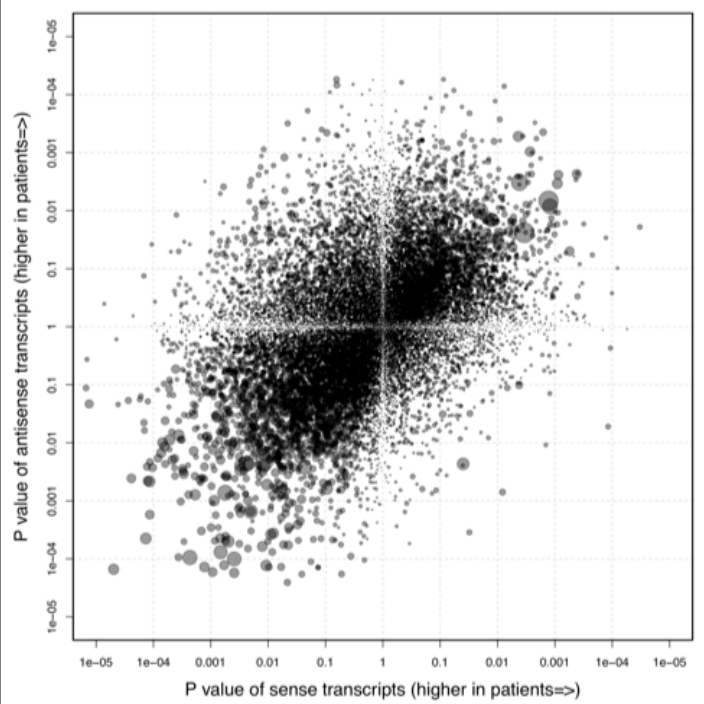

# Figure S10

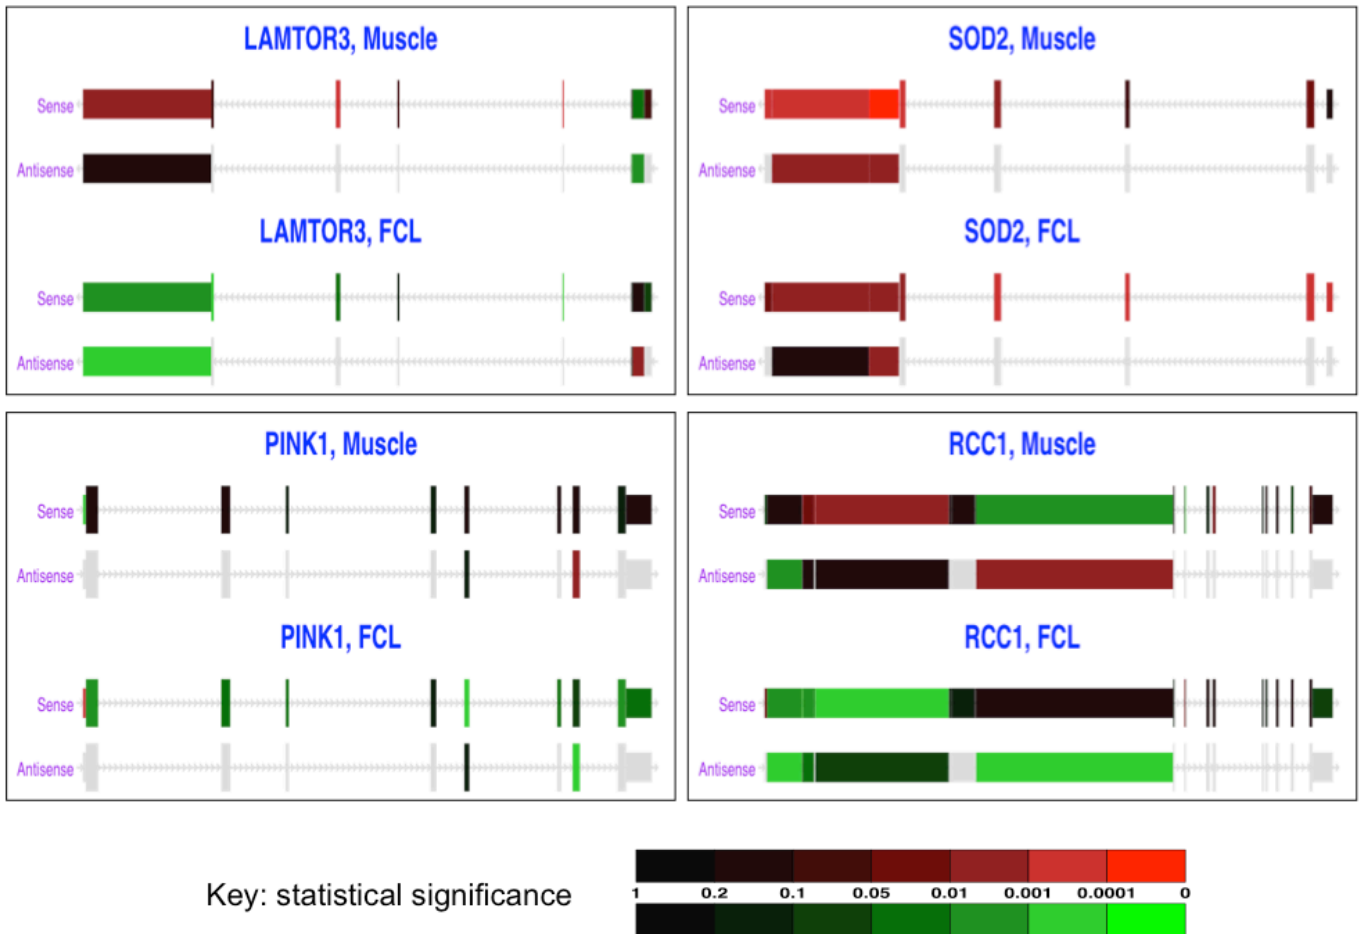

# Figure S11

## Position-specific differential expression within UTRs

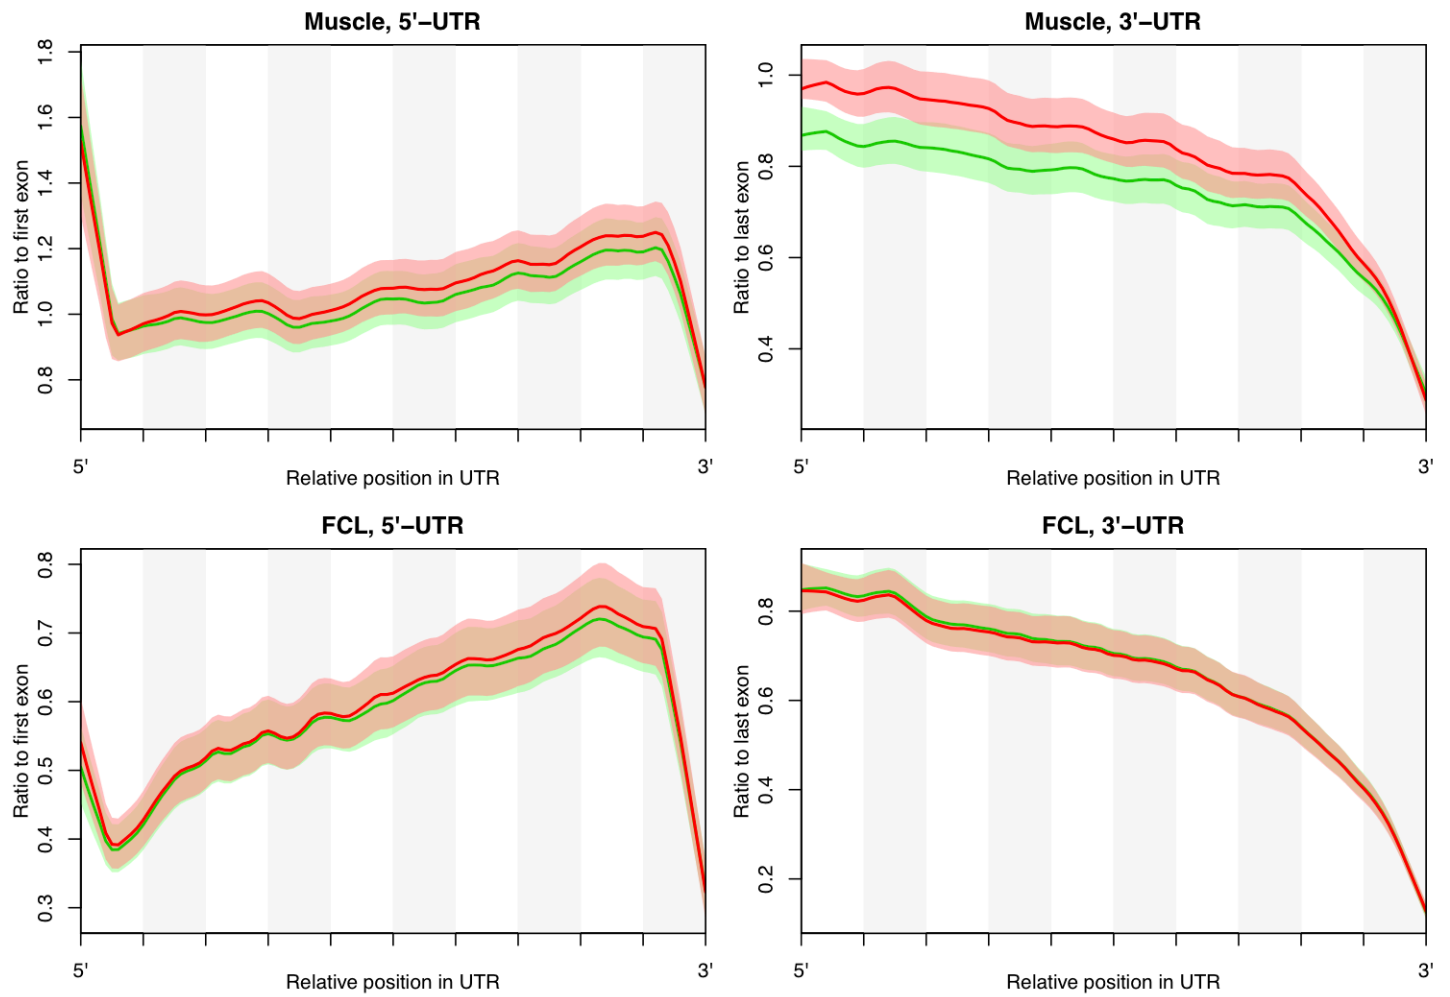

**Figure S12**

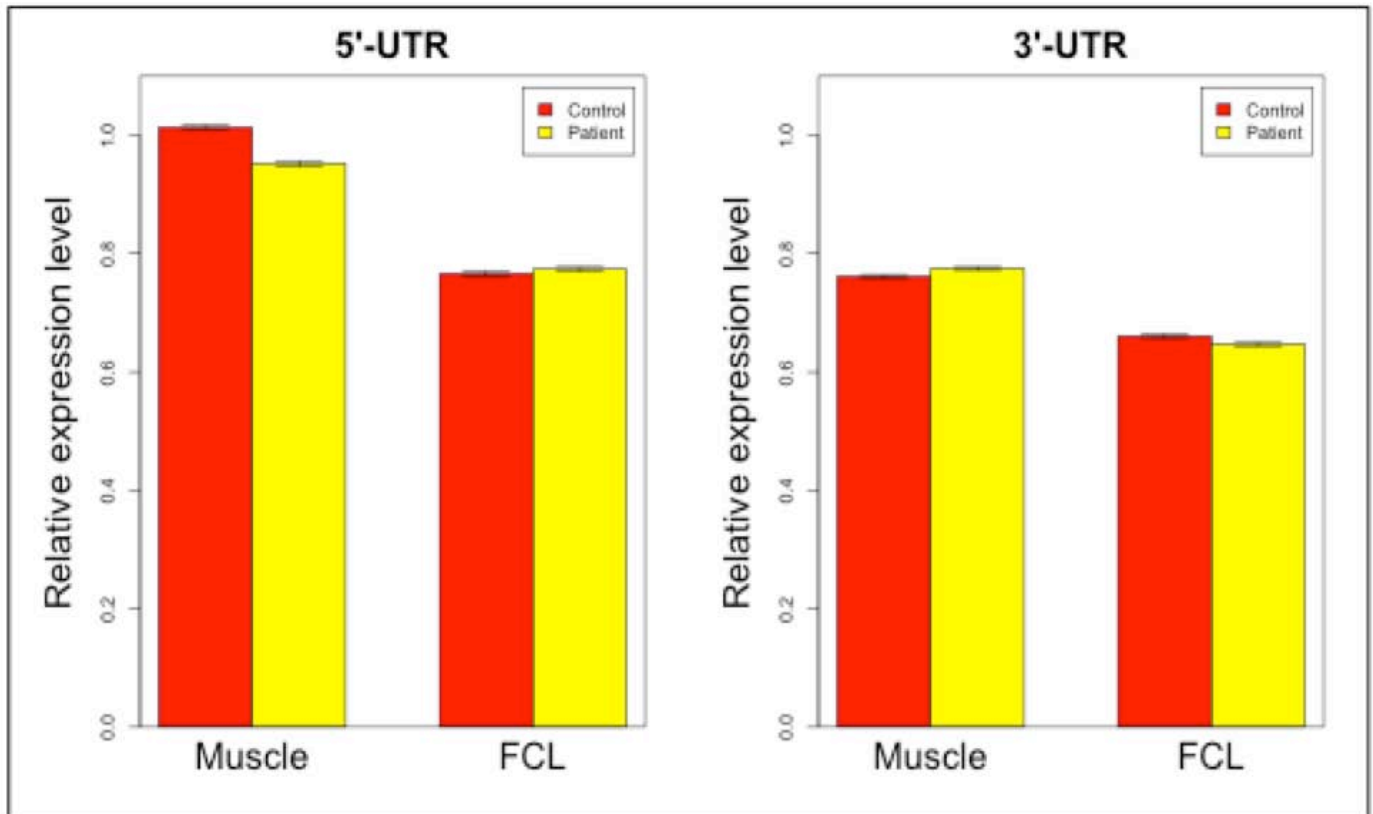

# Figure S13

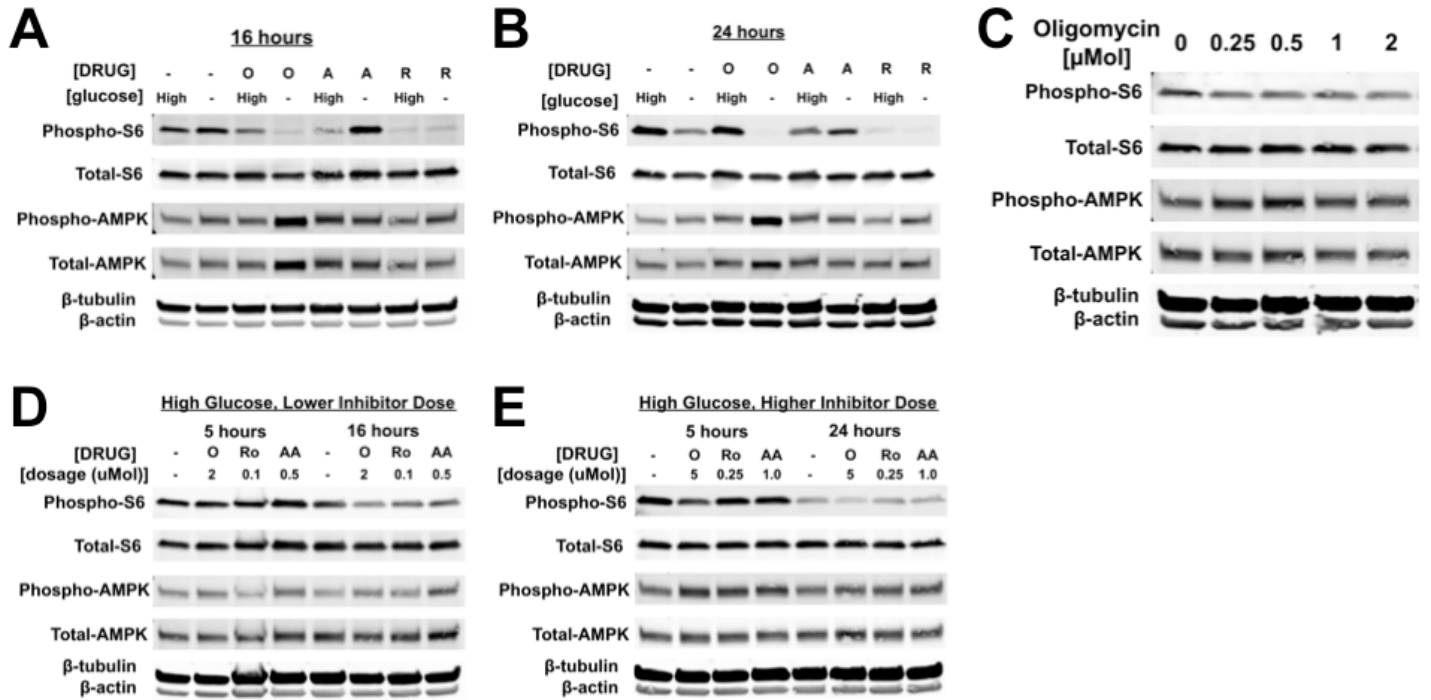

Table S1.

| <b>Gene</b>    | <b>MELAS</b> | <b>PEO</b> | <b>mtDNA deletion</b> | <b>RC disease</b> | <b>GENE NAME</b>                                                    |
|----------------|--------------|------------|-----------------------|-------------------|---------------------------------------------------------------------|
| <i>PGRMC2</i>  | 28.35        | 13.82      | 27.43                 | 13.96             | progesterone receptor membrane component 2                          |
| <i>UBXN2B</i>  | 28.86        | 21.15      | 22.23                 | 14.89             | UBX domain protein 2B                                               |
| <i>ESYT1</i>   | 46.67        | 63.96      | 37.53                 | 28.61             | extended synaptotagmin-like protein 1                               |
| <i>DNAJC15</i> | 65.72        | 26.43      | 42.86                 | 26.89             | DnaJ (Hsp40) homolog, subfamily C, member 15                        |
| <i>EXOC2</i>   | 23.64        | 30.96      | 20.15                 | 21.43             | exocyst complex component 2                                         |
| <i>SPCS3</i>   | 10.75        | 12.11      | 10.36                 | 32.90             | signal peptidase complex subunit 3 homolog ( <i>S. cerevisiae</i> ) |

Table S2

| ID        | Symbol       | Muscle    |          |          |             |       | FCL     |           |          |          |             | Full name |       |                                                                                                                  |
|-----------|--------------|-----------|----------|----------|-------------|-------|---------|-----------|----------|----------|-------------|-----------|-------|------------------------------------------------------------------------------------------------------------------|
|           |              | Mean_Ctrl | Mean_Mto | Mto_Ctrl | Fold_change | P_SAM | FDR_SAM | Mean_Ctrl | Mean_Mto | Mto_Ctrl | Fold_change |           | P_SAM | FDR_SAM                                                                                                          |
| 6648      | SOD2         | 9.92      | 10.44    | 0.52     | 1.43        | 0.01  | 0.04    | 10.75     | 11.56    | 0.80     | 1.75        | 0.00      | 0.08  | superoxide dismutase 2, mitochondrial                                                                            |
| 30001     | ERO1L        | 6.75      | 7.17     | 0.42     | 1.34        | 0.01  | 0.04    | 10.34     | 10.56    | 0.22     | 1.16        | 0.04      | 0.16  | ERO1-like (S. cerevisiae)                                                                                        |
| 29103     | DNAJC15      | 7.33      | 7.68     | 0.34     | 1.27        | 0.02  | 0.06    | 9.77      | 10.10    | 0.33     | 1.26        | 0.02      | 0.10  | Dnaj (Hsp40) homolog, subfamily C, member 15                                                                     |
| 81671     | VMP1         | 7.87      | 8.19     | 0.32     | 1.25        | 0.01  | 0.04    | 10.69     | 10.83    | 0.14     | 1.10        | 0.03      | 0.14  | vacuole membrane protein 1                                                                                       |
| 3454      | IFNAR1       | 7.39      | 7.65     | 0.27     | 1.20        | 0.04  | 0.11    | 9.66      | 9.90     | 0.25     | 1.19        | 0.04      | 0.14  | interferon (alpha, beta and omega) receptor 1                                                                    |
| 25853     | DCAF12       | 7.42      | 7.67     | 0.25     | 1.19        | 0.03  | 0.09    | 9.09      | 9.27     | 0.18     | 1.13        | 0.02      | 0.12  | DDB1 and CUL4 associated factor 12                                                                               |
| 1317      | SLC31A1      | 6.61      | 6.85     | 0.24     | 1.18        | 0.02  | 0.05    | 10.61     | 10.84    | 0.23     | 1.17        | 0.02      | 0.10  | solute carrier family 31 (copper transporters), member 1                                                         |
| 79607     | FAM118B      | 7.30      | 7.53     | 0.23     | 1.18        | 0.03  | 0.06    | 9.23      | 9.37     | 0.15     | 1.11        | 0.01      | 0.10  | family with sequence similarity 118, member B                                                                    |
| 54994     | C20orf11     | 7.39      | 7.62     | 0.23     | 1.17        | 0.01  | 0.04    | 8.92      | 9.02     | 0.10     | 1.07        | 0.03      | 0.12  | chromosome 20 open reading frame 11                                                                              |
| 5663      | PSEN1        | 7.11      | 7.34     | 0.22     | 1.17        | 0.03  | 0.09    | 9.76      | 9.97     | 0.21     | 1.15        | 0.01      | 0.08  | presenilin 1                                                                                                     |
| 3920      | LAMP2        | 8.49      | 8.71     | 0.22     | 1.17        | 0.04  | 0.11    | 11.09     | 11.26    | 0.16     | 1.12        | 0.03      | 0.12  | lysosomal-associated membrane protein 2                                                                          |
| 54877     | ZCCHC2       | 6.85      | 7.06     | 0.21     | 1.16        | 0.05  | 0.12    | 8.29      | 8.53     | 0.23     | 1.17        | 0.03      | 0.14  | zinc finger, CCHC domain containing 2                                                                            |
| 2120      | ETV6         | 7.01      | 7.22     | 0.21     | 1.16        | 0.04  | 0.11    | 9.33      | 9.50     | 0.18     | 1.13        | 0.03      | 0.12  | ets variant 6                                                                                                    |
| 55731     | C17orf63     | 7.43      | 7.63     | 0.20     | 1.15        | 0.01  | 0.04    | 8.33      | 8.43     | 0.10     | 1.07        | 0.03      | 0.12  | chromosome 17 open reading frame 63                                                                              |
| 55084     | SOBP         | 7.15      | 7.34     | 0.19     | 1.14        | 0.01  | 0.04    | 7.00      | 7.21     | 0.21     | 1.16        | 0.05      | 0.16  | sine oculis binding protein homolog (Drosophila)                                                                 |
| 4087      | SMAD2        | 7.81      | 8.00     | 0.19     | 1.14        | 0.01  | 0.03    | 9.57      | 9.70     | 0.14     | 1.10        | 0.02      | 0.12  | SMAD family member 2                                                                                             |
| 84945     | ABHD13       | 7.34      | 7.52     | 0.18     | 1.13        | 0.03  | 0.06    | 8.96      | 9.13     | 0.17     | 1.13        | 0.03      | 0.12  | abhydrolase domain containing 13                                                                                 |
| 284058    | KIAA1267     | 7.23      | 7.40     | 0.17     | 1.12        | 0.03  | 0.09    | 8.43      | 8.62     | 0.18     | 1.13        | 0.04      | 0.16  | KIAA1267                                                                                                         |
| 56160     | NDNL2        | 6.88      | 7.02     | 0.14     | 1.10        | 0.02  | 0.05    | 8.17      | 8.29     | 0.12     | 1.09        | 0.03      | 0.14  | necdin-like 2                                                                                                    |
| 55851     | PSENEN       | 7.77      | 7.90     | 0.13     | 1.09        | 0.04  | 0.11    | 10.71     | 10.84    | 0.13     | 1.10        | 0.02      | 0.12  | presenilin enhancer 2 homolog (C. elegans)                                                                       |
| 199223    | TTC21A       | 6.50      | 6.43     | -0.07    | 0.95        | 0.04  | 0.09    | 7.18      | 7.04     | -0.15    | 0.90        | 0.00      | 0.03  | tetratricopeptide repeat domain 21A                                                                              |
| 57732     | ZFYVE28      | 6.86      | 6.79     | -0.07    | 0.95        | 0.03  | 0.09    | 7.48      | 7.40     | -0.08    | 0.95        | 0.04      | 0.12  | zinc finger, FYVE domain containing 28                                                                           |
| 81029     | WNT5B        | 6.72      | 6.64     | -0.08    | 0.95        | 0.04  | 0.09    | 7.93      | 7.73     | -0.20    | 0.87        | 0.02      | 0.07  | wingless-type MMTV integration site family, member 5B                                                            |
| 63898     | SH2D4A       | 7.06      | 6.98     | -0.08    | 0.95        | 0.05  | 0.09    | 9.17      | 8.79     | -0.38    | 0.77        | 0.04      | 0.12  | SH2 domain containing 4A                                                                                         |
| 91544     | UBXN11       | 6.85      | 6.76     | -0.08    | 0.94        | 0.04  | 0.09    | 7.63      | 7.55     | -0.08    | 0.95        | 0.04      | 0.12  | UBX domain protein 11                                                                                            |
| 147       | ADRA1B       | 7.11      | 7.03     | -0.08    | 0.94        | 0.03  | 0.09    | 7.78      | 7.52     | -0.26    | 0.84        | 0.03      | 0.10  | adrenergic, alpha-1B-, receptor                                                                                  |
| 9942      | XYLB         | 7.01      | 6.93     | -0.09    | 0.94        | 0.03  | 0.09    | 8.77      | 8.54     | -0.23    | 0.86        | 0.00      | 0.03  | xylulokinase homolog (H. influenzae)                                                                             |
| 5865      | RAB3B        | 6.68      | 6.59     | -0.09    | 0.94        | 0.02  | 0.06    | 9.36      | 8.66     | -0.70    | 0.62        | 0.01      | 0.07  | RAB3B, member RAS oncogene family                                                                                |
| 56120     | PCDHGB8P     | 6.80      | 6.71     | -0.09    | 0.94        | 0.04  | 0.09    | 7.48      | 7.29     | -0.18    | 0.88        | 0.01      | 0.06  | protocadherin gamma subfamily B, 8 pseudogene                                                                    |
| 58538     | MPP4         | 6.49      | 6.39     | -0.10    | 0.93        | 0.02  | 0.06    | 6.95      | 6.78     | -0.18    | 0.89        | 0.03      | 0.10  | membrane protein, palmitoylated 4 (MAGUK p55 subfamily member 4)                                                 |
| 114784    | CSMD2        | 6.77      | 6.67     | -0.10    | 0.93        | 0.01  | 0.06    | 7.70      | 7.43     | -0.27    | 0.83        | 0.04      | 0.12  | CUB and Sushi multiple domains 2                                                                                 |
| 79413     | ZBED2        | 6.71      | 6.61     | -0.10    | 0.93        | 0.05  | 0.09    | 6.95      | 6.85     | -0.10    | 0.93        | 0.01      | 0.05  | zinc finger, BED-type containing 2                                                                               |
| 199221    | DZIP1L       | 6.77      | 6.67     | -0.10    | 0.93        | 0.01  | 0.06    | 7.26      | 7.18     | -0.08    | 0.94        | 0.02      | 0.07  | DAZ interacting protein 1-like                                                                                   |
| 26266     | SLC13A4      | 6.91      | 6.81     | -0.11    | 0.93        | 0.03  | 0.09    | 7.42      | 7.30     | -0.12    | 0.92        | 0.02      | 0.08  | solute carrier family 13 (sodium/sulfate symporters), member 4                                                   |
| 100303749 | LOC100303749 | 6.23      | 6.12     | -0.11    | 0.93        | 0.04  | 0.09    | 6.52      | 6.37     | -0.15    | 0.90        | 0.01      | 0.06  | LSM3 homolog, U6 small nuclear RNA associated (S. cerevisiae) pseudogene                                         |
| 435       | ASL          | 7.21      | 7.10     | -0.12    | 0.92        | 0.00  | 0.06    | 8.93      | 8.67     | -0.27    | 0.83        | 0.03      | 0.10  | argininosuccinate lyase                                                                                          |
| 388948    | LOC388948    | 6.53      | 6.41     | -0.12    | 0.92        | 0.04  | 0.09    | 7.06      | 6.89     | -0.18    | 0.88        | 0.01      | 0.05  | hypothetical LOC388948                                                                                           |
| 10505     | SEMA4F       | 6.89      | 6.77     | -0.12    | 0.92        | 0.01  | 0.06    | 8.18      | 7.98     | -0.20    | 0.87        | 0.02      | 0.07  | sema domain, immunoglobulin domain (Ig), transmembrane domain (TM) and short cytoplasmic domain, (semaphorin) 4F |
| 28956     | LAMTOR2      | 7.40      | 7.27     | -0.13    | 0.92        | 0.02  | 0.06    | 8.58      | 8.44     | -0.14    | 0.91        | 0.03      | 0.10  | late endosomal/lysosomal adaptor, MAPK and MTOR activator 2                                                      |
| 284344    | LOC284344    | 6.41      | 6.27     | -0.13    | 0.91        | 0.00  | 0.06    | 6.69      | 6.47     | -0.22    | 0.86        | 0.01      | 0.04  | hypothetical LOC284344                                                                                           |
| 2817      | GPC1         | 8.18      | 8.03     | -0.14    | 0.90        | 0.03  | 0.06    | 9.91      | 9.60     | -0.31    | 0.81        | 0.04      | 0.12  | glypican 1                                                                                                       |
| 388610    | TRNP1        | 7.29      | 7.12     | -0.17    | 0.89        | 0.00  | 0.06    | 8.57      | 8.34     | -0.24    | 0.85        | 0.05      | 0.14  | TMF1-regulated nuclear protein 1                                                                                 |
| 5675      | PSG6         | 6.83      | 6.62     | -0.21    | 0.86        | 0.02  | 0.06    | 8.18      | 7.65     | -0.52    | 0.70        | 0.01      | 0.06  | pregnancy specific beta-1-glycoprotein 6                                                                         |
| 51334     | PRR16        | 7.40      | 7.16     | -0.24    | 0.85        | 0.02  | 0.06    | 8.98      | 8.70     | -0.28    | 0.83        | 0.03      | 0.10  | proline rich 16                                                                                                  |
| 5339      | PLEC         | 8.59      | 8.33     | -0.26    | 0.84        | 0.04  | 0.09    | 9.90      | 9.71     | -0.19    | 0.88        | 0.04      | 0.12  | plectin                                                                                                          |
| 10370     | CITED2       | 8.29      | 8.01     | -0.28    | 0.83        | 0.01  | 0.06    | 10.21     | 9.89     | -0.32    | 0.80        | 0.02      | 0.07  | Ctbp/p300-interacting transactivator, with Glu/Asp-rich carboxy-terminal domain, 2                               |
| 7170      | TPM3         | 10.13     | 9.80     | -0.32    | 0.80        | 0.04  | 0.09    | 8.46      | 8.31     | -0.16    | 0.90        | 0.01      | 0.07  | tropomyosin 3                                                                                                    |
| 4633      | MYL2         | 13.39     | 12.79    | -0.61    | 0.66        | 0.01  | 0.06    | 6.65      | 6.56     | -0.09    | 0.94        | 0.03      | 0.12  | myosin, light chain 2, regulatory, cardiac, slow                                                                 |
